# Supplementary material for: Satisfaction with maternity care among recent migrants: an interview questionnaire-based study
Source: PubMed Central journal article supplement — BMJ Open. 2021 Jul 16;11(7):e048077. doi: 10.1136/bmjopen-2020-048077 (PMC8287626; doi:10.1136/bmjopen-2020-048077), 2021-07-16
Supplement: bmjopen-2020-048077supp002.pdf [file bmjopen-2020-048077supp002.pdf]

| Socio-demographic and clinical factors | Overall dissatisfaction           |         | Dissatisfaction in pregnancy      |         | Dissatisfaction during birth      |         |
|----------------------------------------|-----------------------------------|---------|-----------------------------------|---------|-----------------------------------|---------|
|                                        | Adjusted OR (95% CI) <sup>a</sup> | P-value | Adjusted OR (95% CI) <sup>a</sup> | P-value | Adjusted OR (95% CI) <sup>a</sup> | P-value |
| Partner                                |                                   |         |                                   |         |                                   |         |
| Non-Norwegian                          | 0.38 (0.18-0.82)                  | *0.014  | 0.33 (0.14-0.74)                  | *0.007  | 0.70 (0.24-1.85)                  | 0.438   |
| Norwegian                              | 1.00                              |         | 1.00                              |         | 1.00                              |         |
| Education                              |                                   |         |                                   |         |                                   |         |
| No completed education                 | 1.36 (0.41-4.53)                  | 0.617   | 1.93 (0.56-6.64)                  | 0.298   | 0.71 (0.13-3.92)                  | 0.691   |
| Primary/secondary school               | 0.39 (0.22-0.73)                  | *0.003  | 0.36 (0.19-0.70)                  | *0.002  | 0.55 (0.25-1.23)                  | 0.147   |
| University                             | 1.00                              |         | 1.00                              |         | 1.00                              |         |
| Norwegian comprehension                |                                   |         |                                   |         |                                   |         |
| None                                   | 0.33 (0.11-1.02)                  | 0.054   | 0.30 (0.09-0.97)                  | *0.045  | 0.54 (0.13-2.28)                  | 0.401   |
| With difficulties                      | 0.26 (0.09-0.71)                  | *0.009  | 0.29 (0.10- 0.81)                 | *0.019  | 0.43 (0.12-1.60)                  | 0.199   |
| Good                                   | 0.24 (0.09-0.62)                  | *0.003  | 0.26 (0.10- 0.69)                 | *0.007  | 0.39 (0.12-1.32)                  | 0.129   |
| Fluently                               | 1.00                              |         | 1.00                              |         | 1.00                              |         |
| Not planned pregnancy                  | 1.97 (1.14-3.42)                  | *0.015  | 2.28 (1.27-4.09)                  | *0.006  | 0.93 (0.44-2.00)                  | 0.858   |
| Planned pregnancy                      | 1.00                              |         | 1.00                              |         | 1.00                              |         |
| Primiparous                            | 1.67 (0.99-2.82)                  | 0.053   | 1.82 (1.04-3.20)                  | *0.037  | 1.69 (0.83-3.41)                  | 0.147   |
| Multiparous                            | 1.00                              |         | 1.00                              |         | 1.00                              |         |
| Caesarean section                      | 0.69 (0.37-1.31)                  | 0.256   | 1.80 (0.86- 3.30)                 | 0.132   | 1.10 (0.46-2.53)                  | 0.873   |
| Not caesarean section                  | 1.00                              |         | 1.00                              |         | 1.00                              |         |

<sup>a</sup> Adjusted for partner Norwegian, Education, Norwegian comprehension, Planned pregnancy, Parity, Caesarean section, Mother GBD, Reason for migration, Age and Length of residency.

Abbreviations: CI; confidence interval. OR; odds ratio.
